# Supplementary material for: Clinical Relevant Polymorphisms Affecting Clopidogrel Pharmacokinetics and Pharmacodynamics: Insights from the Puerto Rico Newborn Screening Program
Source: Int J Environ Res Public Health. 2018 May 30;15(6):1115. doi: 10.3390/ijerph15061115 (PMC6025039; doi:10.3390/ijerph15061115)
Supplement: Supplementary file 1 [file ijerph-15-01115-s001.pdf]

**Table S1.** Genotype and allelic frequencies of seven relevant polymorphisms occurring on four pharmacogenes of interest (i.e., potentially to be associated with clopidogrel response) in the Puerto Rican population. Data correspond to genomic DNA specimens from the PRNSP that were collected from *West* region of the Island of Puerto Rico. Totals are less than expected due either to poor DNA quality or non-calling. \* tagSNP for calling (defining) the *P2RY12* haplotype 2.

| Status/Markers                  | <i>ABCB1</i> |       | <i>PON1</i> |       | <i>CYP2C19*3</i> |       | <i>CYP2C19*4</i> |       | <i>CYP2C19*2</i> |       | <i>CYP2C19*17</i> |       | <i>P2RY12 H2</i> |       |
|---------------------------------|--------------|-------|-------------|-------|------------------|-------|------------------|-------|------------------|-------|-------------------|-------|------------------|-------|
|                                 | (C > T)      |       | (G > A)     |       | (G > A)          |       | (A > G)          |       | (G > A)          |       | (C > T)           |       | (C > T) *        |       |
|                                 | No.          | Freq. | No.         | Freq. | No.              | Freq. | No.              | Freq. | No.              | Freq. | No.               | Freq. | No.              | Freq. |
| <b>Genotypes</b>                |              |       |             |       |                  |       |                  |       |                  |       |                   |       |                  |       |
| Homozygous wild-type (WT)       | 11           | 0.324 | 10          | 0.294 | 33               | 1.000 | 33               | 1.000 | 24               | 0.727 | 25                | 0.781 | 24               | 0.800 |
| Heterozygous                    | 13           | 0.382 | 12          | 0.353 | 0                | 0     | 0                | 0     | 9                | 0.273 | 6                 | 0.188 | 6                | 0.200 |
| Homozygous Variant              | 10           | 0.294 | 12          | 0.353 | 0                | 0     | 0                | 0     | 0                | 0     | 1                 | 0.031 | 0                | 0     |
| Totals (genotypes counts/freq.) | 34           | 1.000 | 34          | 1.000 | 33               | 1.000 | 33               | 1.000 | 33               | 1.000 | 32                | 1.000 | 30               | 1.000 |
| <b>Alleles</b>                  |              |       |             |       |                  |       |                  |       |                  |       |                   |       |                  |       |
| Minor allele (variant)          | 33           | 0.485 | 36          | 0.529 | 0                | 0     | 0                | 0     | 9                | 0.136 | 8                 | 0.125 | 6                | 0.100 |
| Totals (allele counts/freq.)    | 68           | 1.000 | 68          | 1.000 | 66               | 1.000 | 66               | 1.000 | 66               | 1.000 | 64                | 1.000 | 60               | 1.000 |

**Table S2.** Genotype and allelic frequencies of seven relevant polymorphisms occurring on four pharmacogenes of interest (i.e., potentially to be associated with clopidogrel response) in the Puerto Rican population. Data correspond to genomic DNA specimens from the PRNSP that were collected from *Central* region of the Island of Puerto Rico. Totals are less than expected due either to poor DNA quality or non-calling. \* tagSNP for calling (defining) the *P2RY12* haplotype 2.

| Status/Markers                  | <i>ABCB1</i> |       | <i>PON1</i> |       | <i>CYP2C19*3</i> |       | <i>CYP2C19*4</i> |       | <i>CYP2C19*2</i> |       | <i>CYP2C19*17</i> |       | <i>P2RY12 H2</i> |       |
|---------------------------------|--------------|-------|-------------|-------|------------------|-------|------------------|-------|------------------|-------|-------------------|-------|------------------|-------|
|                                 | (C > T)      |       | (G > A)     |       | (G > A)          |       | (A > G)          |       | (G > A)          |       | (C > T)           |       | (C > T) *        |       |
|                                 | No.          | Freq. | No.         | Freq. | No.              | Freq. | No.              | Freq. | No.              | Freq. | No.               | Freq. | No.              | Freq. |
| <b>Genotypes</b>                |              |       |             |       |                  |       |                  |       |                  |       |                   |       |                  |       |
| Homozygous wild-type (WT)       | 17           | 0.283 | 21          | 0.350 | 60               | 1.000 | 60               | 1.000 | 46               | 0.767 | 46                | 0.767 | 47               | 0.783 |
| Heterozygous                    | 38           | 0.633 | 30          | 0.500 | 0                | 0     | 0                | 0     | 14               | 0.233 | 13                | 0.217 | 13               | 0.217 |
| Homozygous Variant              | 5            | 0.083 | 9           | 0.150 | 0                | 0     | 0                | 0     | 0                | 0     | 1                 | 0.017 | 0                | 0     |
| Totals (genotypes counts/freq.) | 60           | 1.000 | 60          | 1.000 | 60               | 1.000 | 60               | 1.000 | 60               | 1.000 | 60                | 1.000 | 60               | 1.000 |
| <b>Alleles</b>                  |              |       |             |       |                  |       |                  |       |                  |       |                   |       |                  |       |
| Minor allele (variant)          | 48           | 0.400 | 48          | 0.400 | 0                | 0     | 0                | 0     | 14               | 0.117 | 15                | 0.125 | 13               | 0.108 |

| Totals (allele counts/freq.) | 120 | 1.000 | 120 | 1.000 | 120 | 1.000 | 120 | 1.000 | 120 | 1.000 | 120 | 1.000 | 120 | 1.000 |
|------------------------------|-----|-------|-----|-------|-----|-------|-----|-------|-----|-------|-----|-------|-----|-------|
|------------------------------|-----|-------|-----|-------|-----|-------|-----|-------|-----|-------|-----|-------|-----|-------|

**Table S3.** Genotype and allelic frequencies of seven relevant polymorphisms occurring on four pharmacogenes of interest (i.e., potentially to be associated with clopidogrel response) in the Puerto Rican population. Data correspond to genomic DNA specimens from the PRNSP that were collected from East region of the Island of Puerto Rico. Totals are less than expected due either to poor DNA quality or non-calling. \* tagSNP for calling (defining) the P2RY12 haplotype 2.

| Status/Markers                  | <i>ABCB1</i> |       | <i>PON1</i> |       | <i>CYP2C19*3</i> |       | <i>CYP2C19*4</i> |       | <i>CYP2C19*2</i> |       | <i>CYP2C19*17</i> |       | <i>P2RY12 H2</i> |       |
|---------------------------------|--------------|-------|-------------|-------|------------------|-------|------------------|-------|------------------|-------|-------------------|-------|------------------|-------|
|                                 | (C > T)      |       | (G > A)     |       | (G > A)          |       | (A > G)          |       | (G > A)          |       | (C > T)           |       | (C > T) *        |       |
|                                 | No.          | Freq. | No.         | Freq. | No.              | Freq. | No.              | Freq. | No.              | Freq. | No.               | Freq. | No.              | Freq. |
| <b>Genotypes</b>                |              |       |             |       |                  |       |                  |       |                  |       |                   |       |                  |       |
| Homozygous wild-type (WT)       | 41           | 0.406 | 26          | 0.267 | 101              | 1.000 | 100              | 0.990 | 73               | 0.723 | 71                | 0.703 | 78               | 0.780 |
| Heterozygous                    | 43           | 0.426 | 54          | 0.535 | 0                | 0     | 1                | 0.009 | 26               | 0.257 | 28                | 0.277 | 22               | 0.220 |
| Homozygous Variant              | 17           | 0.168 | 21          | 0.208 | 0                | 0     | 0                | 0     | 2                | 0.020 | 2                 | 0.020 | 0                | 0     |
| Totals (genotypes counts/freq.) | 101          | 1.000 | 101         | 1.000 | 101              | 1.000 | 101              | 1.000 | 101              | 1.000 | 101               | 1.000 | 100              | 1.000 |
| <b>Alleles</b>                  |              |       |             |       |                  |       |                  |       |                  |       |                   |       |                  |       |
| Minor allele (variant)          | 77           | 0.382 | 96          | 0.475 | 0                | 0     | 1                | 0.005 | 30               | 0.149 | 32                | 0.158 | 22               | 0.110 |
| Totals (allele counts/freq.)    | 202          | 1.000 | 202         | 1.000 | 202              | 1.000 | 202              | 1.000 | 202              | 1.000 | 202               | 1.000 | 200              | 1.000 |

**Table S4.** Comparisons of minor allele frequencies (MAFs) between the study cohort (West Region) and all the parental/ reference populations of the 1000 Genome Project/Phase 3 at seven locus of interest selected for this study. The corresponding *p*-values are given in the column named “Sign.”, where an asterisk is added to indicate statistical significance (*p* < 0.05). MAF<sub>PR</sub> stands for observed minor allele frequency in Puerto Ricans from the study cohort.

| Population/Markers                               | <i>ABCB1</i>                            |         | <i>PON1</i>                             |         | <i>CYP2C19*3</i>                   |       | <i>CYP2C19*4</i>                   |       | <i>CYP2C19*2</i>                       |         | <i>CYP2C19*17</i>                      |         | <i>P2RY12 H2**</i>                     |       |
|--------------------------------------------------|-----------------------------------------|---------|-----------------------------------------|---------|------------------------------------|-------|------------------------------------|-------|----------------------------------------|---------|----------------------------------------|---------|----------------------------------------|-------|
|                                                  | N = 34;<br>(MAF <sub>PR</sub> : 0.4853) |         | N = 34;<br>(MAF <sub>PR</sub> : 0.5294) |         | N = 33;<br>(MAF <sub>PR</sub> : 0) |       | N = 33;<br>(MAF <sub>PR</sub> : 0) |       | N = 33;<br>(MAF <sub>PR</sub> : 0.136) |         | N = 32;<br>(MAF <sub>PR</sub> : 0.125) |         | N = 30;<br>(MAF <sub>PR</sub> : 0.100) |       |
|                                                  | MAF<br>(A)                              | Sign.   | MAF<br>(T)                              | Sign.   | MAF<br>(A)                         | Sign. | MAF<br>(G)                         | Sign. | MAF<br>(A)                             | Sign.   | MAF<br>(T)                             | Sign.   | MAF<br>(G)                             | Sign. |
| <b>1000 Genome Project Reference Populations</b> |                                         |         |                                         |         |                                    |       |                                    |       |                                        |         |                                        |         |                                        |       |
| YRI (n=88)                                       | 0.119                                   | <0.01 * | 0.193                                   | <0.01 * | 0.000                              | -     | 0.000                              | -     | 0.165                                  | 0.704   | 0.256                                  | 0.126   | 0.170                                  | 0.357 |
| CEU (n=87)                                       | 0.414 ‡                                 | 0.317   | 0.310 ¶                                 | 0.097   | 0.000                              | -     | 0.000                              | -     | 0.138                                  | 0.984   | 0.224                                  | 0.230   | 0.195                                  | 0.234 |
| CHB (n=97)                                       | 0.397                                   | 0.368   | 0.397                                   | 0.180   | 0.046                              | 0.211 | 0.005                              | 0.682 | 0.320                                  | 0.041 * | 0.260                                  | 0.026 * | 0.211                                  | 0.171 |
| AMR (n=181)                                      | 0.461                                   | 0.794   | 0.475 ¶                                 | 0.960   | 0.000                              | -     | 0.006                              | 0.653 | 0.133                                  | 0.960   | 0.116                                  | 0.881   | 0.108                                  | 0.896 |

|                               |       |       |       |       |       |       |       |       |       |       |       |       |       |       |
|-------------------------------|-------|-------|-------|-------|-------|-------|-------|-------|-------|-------|-------|-------|-------|-------|
| Overall Population<br>(n=453) | 0.405 | 0.357 | 0.465 | 0.465 | 0.010 | 0.562 | 0.003 | 0.749 | 0.180 | 0.529 | 0.145 | 0.756 | 0.159 | 0.389 |
|-------------------------------|-------|-------|-------|-------|-------|-------|-------|-------|-------|-------|-------|-------|-------|-------|

Notes: # G is the minor allele at this locus in Europeans; ¶ C is the minor allele at this locus in Europeans and Latinos; \*\* This is the tagSNP for calling (defining) the P2RY12 haplotype 2. \* means statistically significant difference.

**Table S5.** Comparisons of minor allele frequencies (MAFs) between the study cohort (Central Region) and all the parental/ reference populations of the 1000 Genome Project/Phase 3 at seven locus of interest selected for this study. The corresponding *p*-values are given in the column named “Sign.”, where an asterisk is added to indicate statistical significance ( $p < 0.05$ ). MAF<sub>PR</sub> stands for observed minor allele frequency in Puerto Ricans from the study cohort.

| Population/Markers                        | ABCB1                       |         | PON1                        |         | CYP2C19*3               |       | CYP2C19*4               |       | CYP2C19*2                   |         | CYP2C19*17                  |         | P2RY12 H2**                 |       |
|-------------------------------------------|-----------------------------|---------|-----------------------------|---------|-------------------------|-------|-------------------------|-------|-----------------------------|---------|-----------------------------|---------|-----------------------------|-------|
|                                           | N = 60;                     |         | N = 60;                     |         | N = 60;                 |       | N = 60;                 |       | N = 60;                     |         | N = 60;                     |         | N = 60;                     |       |
|                                           | (MAF <sub>PR</sub> : 0.400) |         | (MAF <sub>PR</sub> : 0.400) |         | (MAF <sub>PR</sub> : 0) |       | (MAF <sub>PR</sub> : 0) |       | (MAF <sub>PR</sub> : 0.117) |         | (MAF <sub>PR</sub> : 0.125) |         | (MAF <sub>PR</sub> : 0.108) |       |
|                                           | MAF                         | Sign.   | MAF                         | Sign.   | MAF                     | Sign. | MAF                     | Sign. | MAF                         | Sign.   | MAF                         | Sign.   | MAF                         | Sign. |
|                                           | (A)                         |         | (T)                         |         | (A)                     |       | (G)                     |       | (A)                         |         | (T)                         |         | (G)                         |       |
| 1000 Genome Project Reference Populations |                             |         |                             |         |                         |       |                         |       |                             |         |                             |         |                             |       |
| YRI (n = 88)                              | 0.119                       | <0.01 * | 0.193                       | <0.01 * | 0.000                   | -     | 0.000                   | -     | 0.165                       | 0.412   | 0.256                       | 0.051   | 0.170                       | 0.293 |
| CEU (n = 87)                              | 0.414 #                     | 0.026 * | 0.310 ¶                     | <0.01 * | 0.000                   | -     | 0.000                   | -     | 0.138                       | 0.704   | 0.224                       | 0.128   | 0.195                       | 0.158 |
| CHB (n = 97)                              | 0.397                       | 0.968   | 0.397                       | 0.968   | 0.046                   | 0.091 | 0.005                   | 0.582 | 0.320                       | <0.01 * | 0.260                       | 0.013 * | 0.211                       | 0.097 |
| AMR (n = 181)                             | 0.461                       | 0.412   | 0.475 ¶                     | 0.093   | 0.000                   | -     | 0.006                   | 0.548 | 0.133                       | 0.741   | 0.116                       | 0.849   | 0.108                       | 0.992 |
| Overall Population<br>(n = 453)           | 0.405                       | 0.944   | 0.465                       | 0.342   | 0.010                   | 0.435 | 0.003                   | 0.675 | 0.180                       | 0.223   | 0.145                       | 0.674   | 0.159                       | 0.308 |

Notes: # G is the minor allele at this locus in Europeans; ¶ C is the minor allele at this locus in Europeans and Latinos; \*\* This is the tagSNP for calling (defining) the P2RY12 haplotype 2. \* means statistically significant difference.

**Table S6.** Comparisons of minor allele frequencies (MAFs) between the study cohort (East Region) and all the parental/ reference populations of the 1000 Genome Project/Phase 3 at seven locus of interest selected for this study. The corresponding *p*-values are given in the column named “Sign.”, where an asterisk is added to indicate statistical significance ( $p < 0.05$ ). MAF<sub>PR</sub> stands for observed minor allele frequency in Puerto Ricans from the study cohort.

| Population/Markers                        | ABCB1                       |       | PON1                        |       | CYP2C19*3               |       | CYP2C19*4                   |       | CYP2C19*2                   |       | CYP2C19*17                  |       | P2RY12 H2**                 |       |
|-------------------------------------------|-----------------------------|-------|-----------------------------|-------|-------------------------|-------|-----------------------------|-------|-----------------------------|-------|-----------------------------|-------|-----------------------------|-------|
|                                           | N = 101;                    |       | N = 101;                    |       | N = 101;                |       | N = 101;                    |       | N = 101;                    |       | N = 101;                    |       | N = 100;                    |       |
|                                           | (MAF <sub>PR</sub> : 0.381) |       | (MAF <sub>PR</sub> : 0.475) |       | (MAF <sub>PR</sub> : 0) |       | (MAF <sub>PR</sub> : 0.005) |       | (MAF <sub>PR</sub> : 0.148) |       | (MAF <sub>PR</sub> : 0.158) |       | (MAF <sub>PR</sub> : 0.110) |       |
|                                           | MAF                         | Sign. | MAF                         | Sign. | MAF                     | Sign. | MAF                         | Sign. | MAF                         | Sign. | MAF                         | Sign. | MAF                         | Sign. |
|                                           | (A)                         |       | (T)                         |       | (A)                     |       | (G)                         |       | (A)                         |       | (T)                         |       | (G)                         |       |
| 1000 Genome Project Reference Populations |                             |       |                             |       |                         |       |                             |       |                             |       |                             |       |                             |       |

|                                      |         |         |         |         |       |       |       |       |       |         |       |         |       |       |
|--------------------------------------|---------|---------|---------|---------|-------|-------|-------|-------|-------|---------|-------|---------|-------|-------|
| YRI ( <i>n</i> = 88)                 | 0.119   | <0.01 * | 0.193   | <0.01 * | 0.000 | -     | 0.000 | 0.509 | 0.165 | 0.756   | 0.256 | 0.097   | 0.170 | 0.234 |
| CEU ( <i>n</i> = 87)                 | 0.414 # | <0.01 * | 0.310 ¶ | <0.01 * | 0.000 | -     | 0.000 | 0.509 | 0.138 | 0.841   | 0.224 | 0.250   | 0.195 | 0.103 |
| CHB ( <i>n</i> = 97)                 | 0.397   | 0.818   | 0.397   | 0.267   | 0.046 | 0.293 | 0.005 | 0.999 | 0.320 | <0.01 * | 0.260 | <0.01 * | 0.211 | 0.053 |
| AMR ( <i>n</i> = 181)                | 0.461   | 0.193   | 0.475 ¶ | 0.423   | 0.000 | -     | 0.006 | 0.912 | 0.133 | 0.718   | 0.116 | 0.312   | 0.108 | 0.960 |
| Overall Population ( <i>n</i> = 453) | 0.405   | 0.659   | 0.465   | 0.849   | 0.010 | 0.312 | 0.003 | 0.756 | 0.180 | 0.453   | 0.145 | 0.728   | 0.159 | 0.215 |

Notes: # G is the minor allele at this locus in Europeans; ¶ C is the minor allele at this locus in Europeans and Latinos; \*\* This is the tagSNP for calling (defining) the P2RY12 haplotype 2. \* means statistically significant difference.
